# Supplementary material for: In vitro protein digestibility of RuBisCO-enriched wheat dough: a comparative study with pea and gluten proteins
Source: Royal Society of Chemistry journal article supplement (doi:10.1039/d3fo05652j), 2024-01-01

## Supplementary material

**Supplementary material 1.** Sequential extraction of proteins from “enzyme-free” control samples, also called blank: protein soluble in the supernatant, pellet proteins soluble in denaturing buffer (SDS) and pellet proteins soluble in reducing buffer (SDS+DTE). The sum of the three gives the yield of extraction of the analysis method. Each parameter is expressed in % of total dough proteins.

| Doughs               | Soluble (%) | SDS-soluble (%) | SDS+DTE soluble (%) | Yield of extraction (%) |
|----------------------|-------------|-----------------|---------------------|-------------------------|
| Control              | 12.7 ± 1.0  | 38.5 ± 5.5      | 36.8 ± 3.8          | 88.0 ± 2.1              |
| RuBisCO-enriched     | 13.8 ± 2.0  | 39.2 ± 0.5      | 37.4 ± 0.3          | 90.3 ± 2.7              |
| Gluten-enriched      | 10.4 ± 4.2  | 21.4 ± 0.3      | 61.5 ± 0.4          | 93.2 ± 0.3              |
| Pea protein-enriched | 10.0 ± 2.4  | 33.3 ± 11.3     | 50.4 ± 8.6          | 93.7 ± 2.8              |

**Supplementary material 2.** SE-HPLC profiles of proteins of “enzyme-free” control samples: in supernatant (left), in pellet soluble in SDS (middle) and in pellet insoluble in SDS but soluble in SDS+DTE (right). Black lines stand for control dough, green lines for RuBisCO-enriched dough, blue lines for pea protein-enriched dough and orange lines for gluten-enriched dough. Elution profile of SDS+DTE soluble proteins is represented only from 5 kg mol<sup>-1</sup> because iodoacetamide molecules used to alkyl thiol function are eluted below.

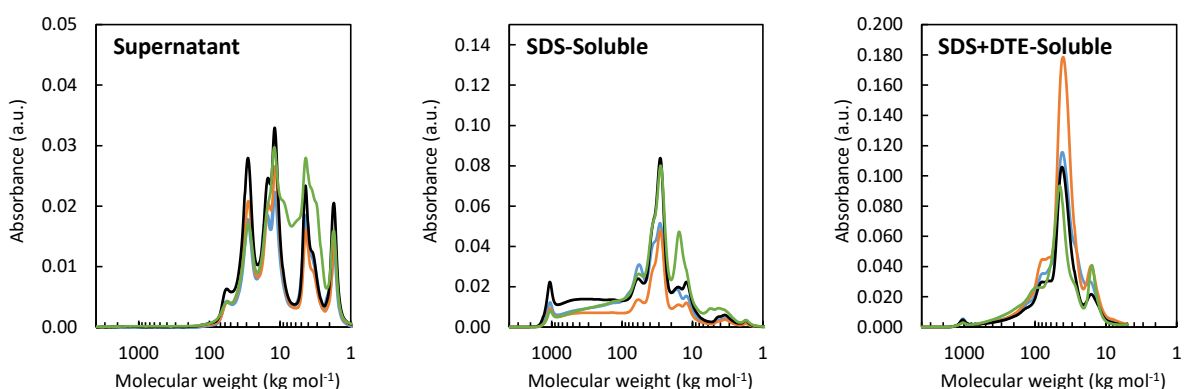

**Supplementary material 3.** SE-HPLC profiles of intestinal supernatant: black line stands for control dough, green line for RuBisCO-enriched dough, blue line for pea protein-enriched doughs, orange line for gluten-enriched dough and red line for enzyme signal.

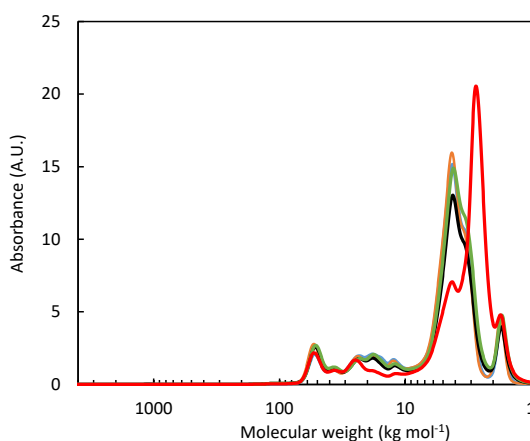

#### Supplementary material 4

The Expsy tool PeptideMass was used to compare the predicted peptide sizes of RuBisCO and wheat gliadins and glutenins subunits. To do so, the UniProt accession numbers as well as the sequences of lettuce RuBisCO, wheat gliadins and wheat glutenins were retrieved from UniprotKB. The UniProt accession number were used to compute the masses of the peptides generated with Trypsin hydrolysis only and with Trypsin/chymotrypsin hydrolysis on the online Expsy tool PeptideMass. The median of the generated peptides was computed as well as the number of peptide normalised to a molecular weight of 30000 g/mol to account for the differences in molecular weight of each sequence.

| UniProt accession number | Protein name                                   | Pepsin digestion      |                               |                                 | Trypsin/Chymotrypsin  |                               |                                 |
|--------------------------|------------------------------------------------|-----------------------|-------------------------------|---------------------------------|-----------------------|-------------------------------|---------------------------------|
|                          |                                                | Sequence coverage (%) | Normalised number of peptides | Median molecular weight (g/mol) | Sequence coverage (%) | Normalised number of peptides | Median molecular weight (g/mol) |
| P02863                   | Alpha/beta-gliadin                             | 10.8                  | 4                             | 607                             | 97.0                  | 13                            | 1591                            |
| P04724                   | Alpha/beta-gliadin A-IV                        | 14.8                  | 6                             | 581                             | 98.2                  | 13                            | 1593                            |
| P04722                   | Alpha/beta-gliadin A-II                        | 15.1                  | 6                             | 662                             | 96.7                  | 13                            | 1522                            |
| P04721                   | Alpha/beta-gliadin A-I                         | 14.5                  | 4                             | 792                             | 97.1                  | 13                            | 1609                            |
| P04725                   | Alpha/beta-gliadin A-V                         | 16.7                  | 6                             | 629                             | 98.0                  | 9                             | 2393                            |
| P04723                   | Alpha/beta-gliadin A-III                       | 15.6                  | 6                             | 612                             | 96.9                  | 10                            | 1587                            |
| P04730                   | Gamma-gliadin (Gliadin B-III)                  | 28.3                  | 10                            | 621                             | 92.6                  | 11                            | 1514                            |
| P08079                   | Gamma-gliadin                                  | 18.5                  | 7                             | 601                             | 99.1                  | 10                            | 2850                            |
| P06659                   | Gamma-gliadin B                                | 20.6                  | 8                             | 646                             | 98.2                  | 12                            | 1641                            |
| P21292                   | Gamma-gliadin                                  | 24.7                  | 9                             | 643                             | 99.3                  | 10                            | 2201                            |
| P08453                   | Gamma-gliadin                                  | 16.2                  | 6                             | 602                             | 99.0                  | 9                             | 1568                            |
| P04729                   | Gamma-gliadin B-I                              | 17.1                  | 6                             | 634                             | 95.0                  | 17                            | 1462                            |
| P10388                   | Glutenin, high molecular weight subunit DX5    | 13.7                  | 3                             | 557                             | 97.1                  | 12                            | 1603                            |
| P10386                   | Glutenin, low molecular weight subunit 1D1     | 19.7                  | 6                             | 658                             | 94.0                  | 14                            | 1508                            |
| P10385                   | Glutenin, low molecular weight subunit         | 22.8                  | 8                             | 664                             | 96.4                  | 15                            | 1343                            |
| P10387                   | Glutenin, high molecular weight subunit DY10   | 12.6                  | 4                             | 594                             | 96.2                  | 15                            | 1413                            |
| P16315                   | Glutenin, low molecular weight subunit PTDUCD1 | 24.4                  | 9                             | 647                             | 96.0                  | 16                            | 1519                            |
| P08488                   | Glutenin, high molecular weight subunit 12     | 12.5                  | 4                             | 640                             | 95.3                  | 14                            | 1730                            |
| P08489                   | Glutenin, high molecular weight subunit PW212  | 13.7                  | 3                             | 557                             | 97.3                  | 13                            | 1592                            |
| P48706                   | RuBisCO large subunit                          | 37.7                  | 17                            | 630                             | 89.3                  | 23                            | 921                             |
| Q40250                   | RuBisCO small subunit                          | 41.6                  | 13                            | 610                             | 94.4                  | 43                            | 1022                            |

**Supplementary material 5.** Analysis of the protein aggregation state of the initial doughs as determined by sequential solubility in denaturing buffer (SDS-soluble) and reducing buffer (SDS-DTE). Methods from Ducrocq *et al.*, 2020 were used.

|                      | SDS soluble proteins      | SDS+DTE soluble proteins |
|----------------------|---------------------------|--------------------------|
|                      | % of extractable proteins |                          |
| Control dough        | 79%                       | 21%                      |
| RuBisCO-enriched     | 65%                       | 35%                      |
| Gluten-enriched      | 75%                       | 25%                      |
| Pea protein-enriched | 76%                       | 24%                      |

**Table 1.** Proportion of SDS-soluble and SDS+DTE soluble proteins in control and protein-enriched doughs at 37.4% RuBisCO, 35.0% gluten and 38.7% pea proteins. Results are means of duplicates, the variation coefficient of this method is below 5%.

The aggregation state of proteins in the control and protein-enriched doughs was estimated from the amount of SDS-soluble and SDS+DTE soluble proteins. These last two protein extracts represent respectively the small and weakly bound polymers and the large disulphide linked polymers.

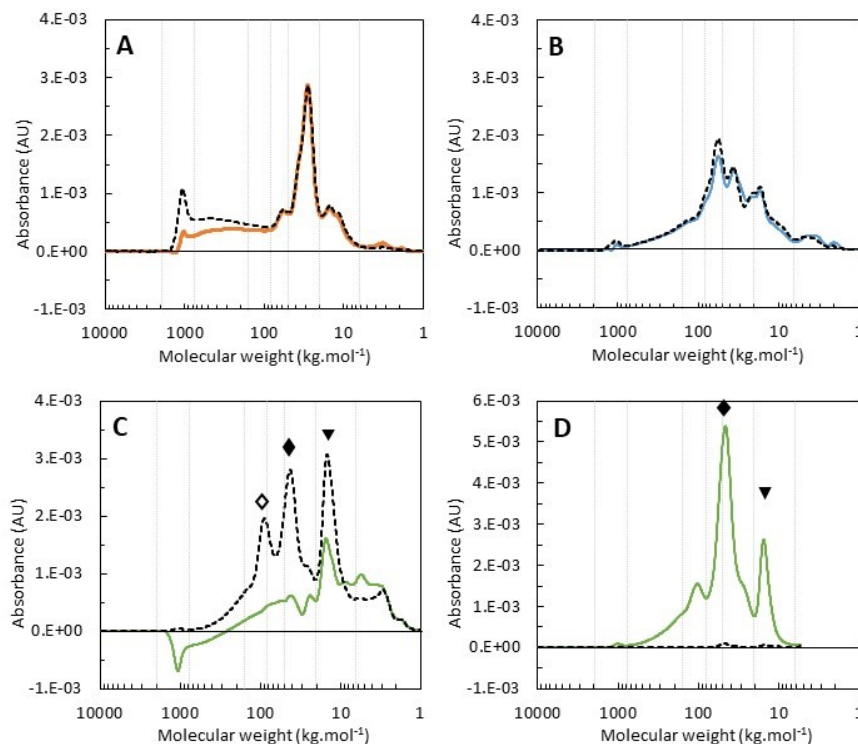

**Figure 1** SE-HPLC SDS soluble protein differential profile (solid line) of thermal treated doughs enriched with 14.9% gluten (A), 17.1% pea proteins (B) and 16.3% RuBisCO (C) and SE-HPLC elution profile of SDS soluble protein (dotted line) extracted from gluten (A), pea proteins (B) and RuBisCO (C) concentrates in proportion of respective enriched doughs. D: SE-HPLC SDS+DTE soluble protein differential profile (solid line) of 16.3% thermal treated RuBisCO-enriched dough and SDS+DTE soluble protein profile (dotted line) from RuBisCO concentrates in respective proportion. Symbols represent RuBisCO subunits: small chain (SC; ▼), large chain (LC; ◆) and large

chain dimer (LC dimer;  $\diamond$ ). For the sake of readability, elution profile of figure D is represented only until  $5 \text{ kg mol}^{-1}$ .

**Supplementary material 6.** Raw FT-IR spectra of the amide I region of raw (dotted lines) and thermally treated (solid lines) doughs. Black lines stand for control dough, light green lines for RuBisCO- enriched dough at 16.3%, dark green lines for RuBisCo-enriched dough at 37.4%, blue lines for pea protein-enriched and orange lines for gluten-enriched doughs. Each spectrum corresponds to the average of 5 consecutive measurements on the exactly same sample.

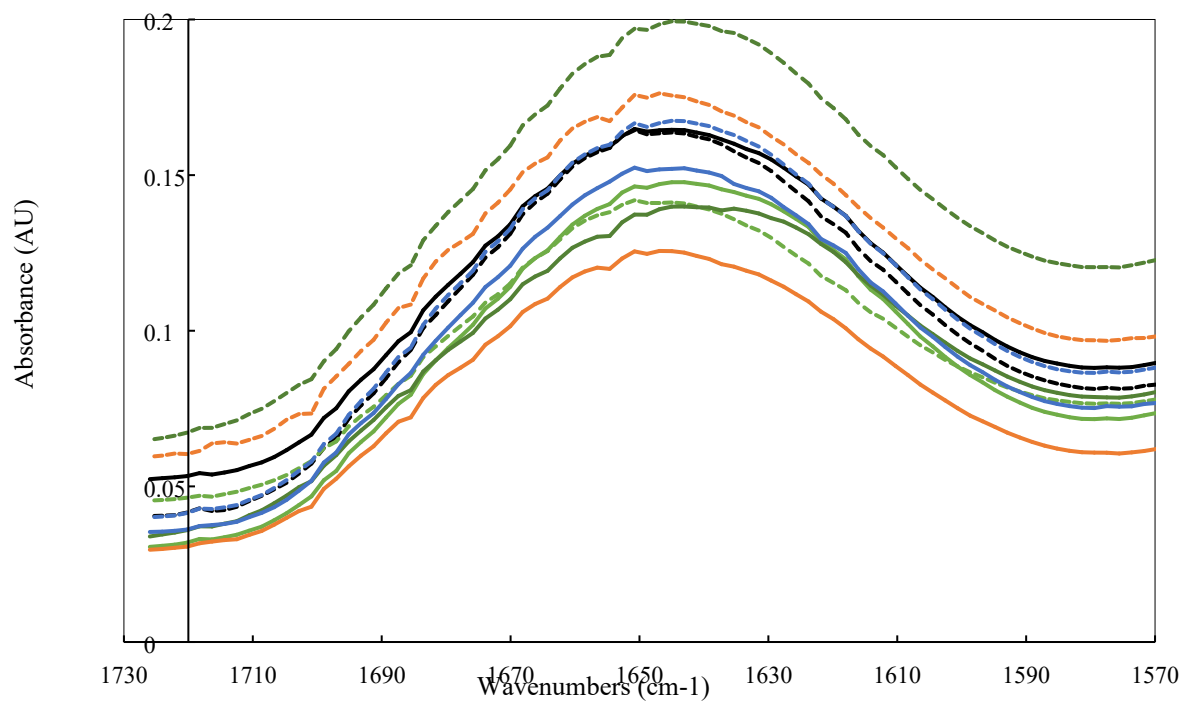

Supplement: d3fo05652j1.pdf [file d3fo05652j1.pdf]
